# Supplementary material for: “I Always Buy the Purple Ones … If I See Them”: Socioecological Factors Influencing Anthocyanin-Rich Food Consumption for Cognitive Health in Older Adults
Source: MDPI journal article supplement (doi:10.3390/nu15051194), 2023-02-27

# VERY BERRY SMOOTHIE

SERVES 1 - LOW ANTHOCYANIN

## INGREDIENTS

- ½ cup frozen blueberries (60g)
- ½ medium banana (50g)
- 1 tablespoon nut butter
  - e.g. peanut, almond (25g)
- 1 cup milk of choice e.g. dairy, soy (250ml)
- ½ cup high protein yogurt (130g)
- Ice

## DIRECTIONS

1. Place all ingredients in high speed blender
2. Blend until smooth
3. Pour smoothie into glass and enjoy

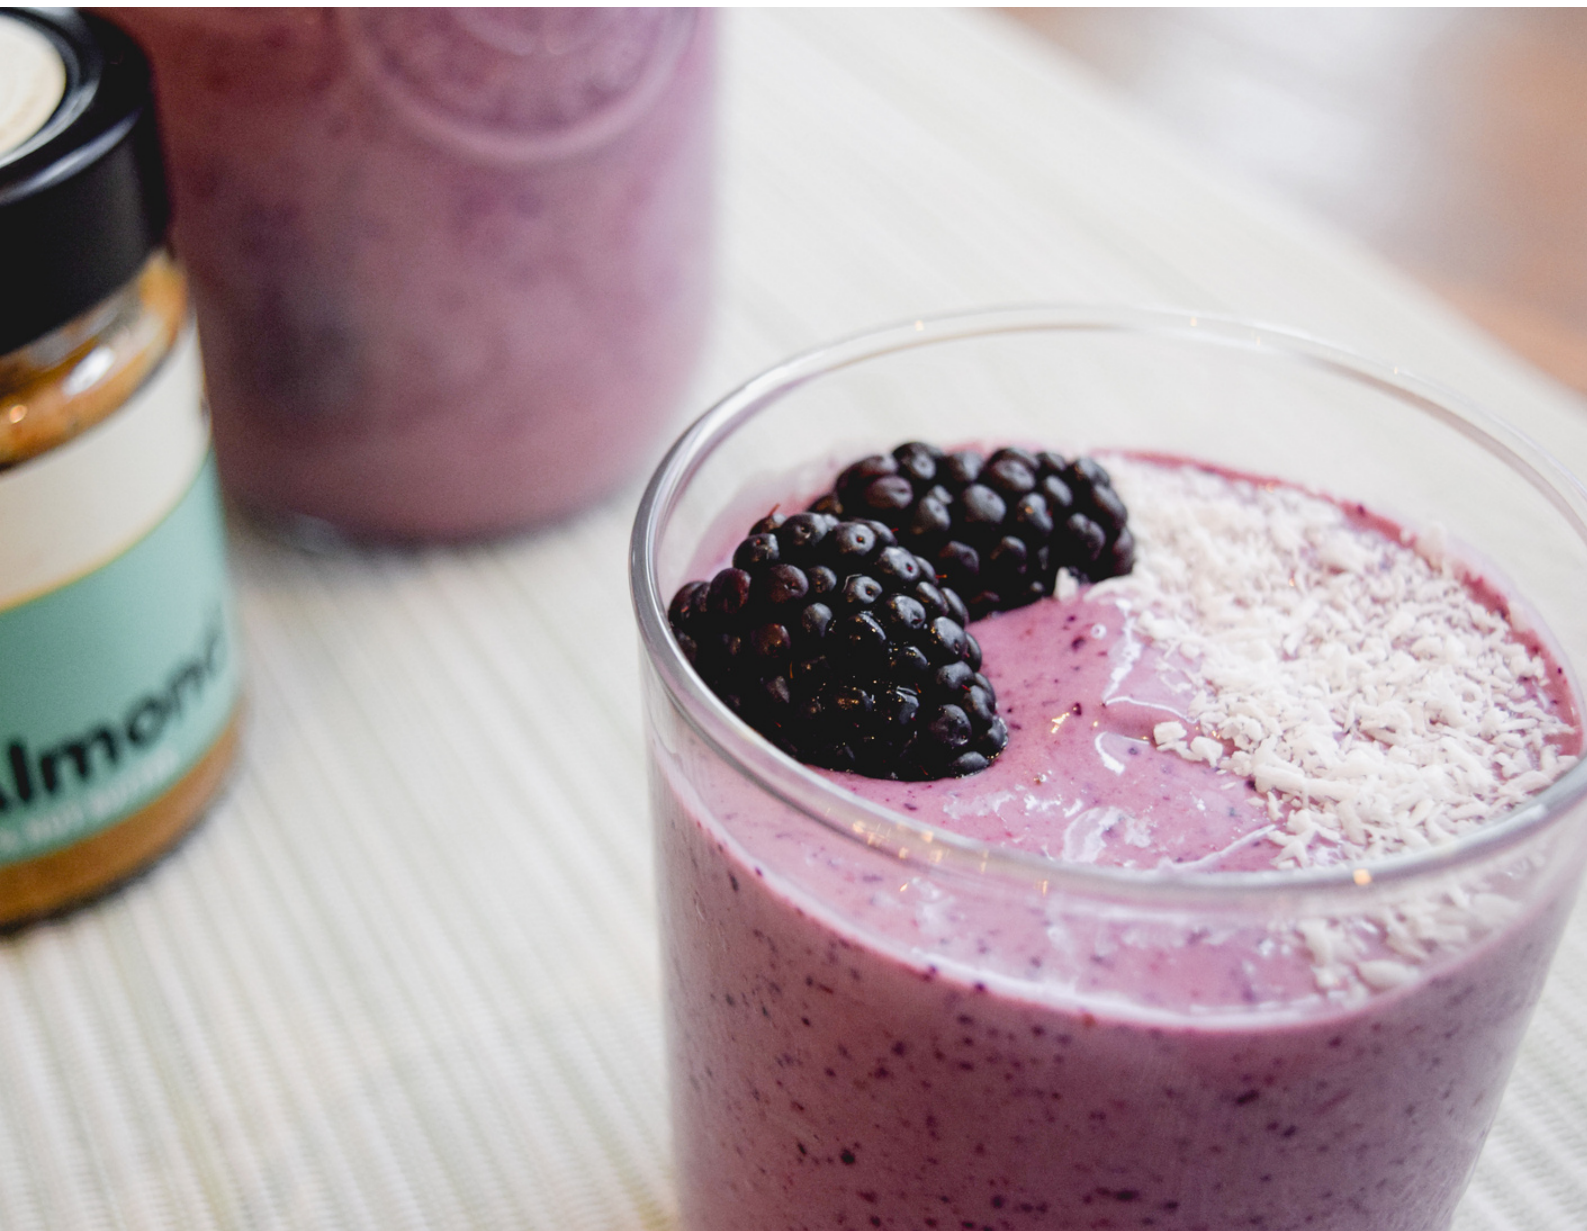



Gently steam or roast purple veggies including eggplant, purple kale, purple potatoes, purple cauliflower, radicchio and red onion with a glug of olive oil. A quick cooking time leaves them crisp and tender, and retains more anthocyanins.

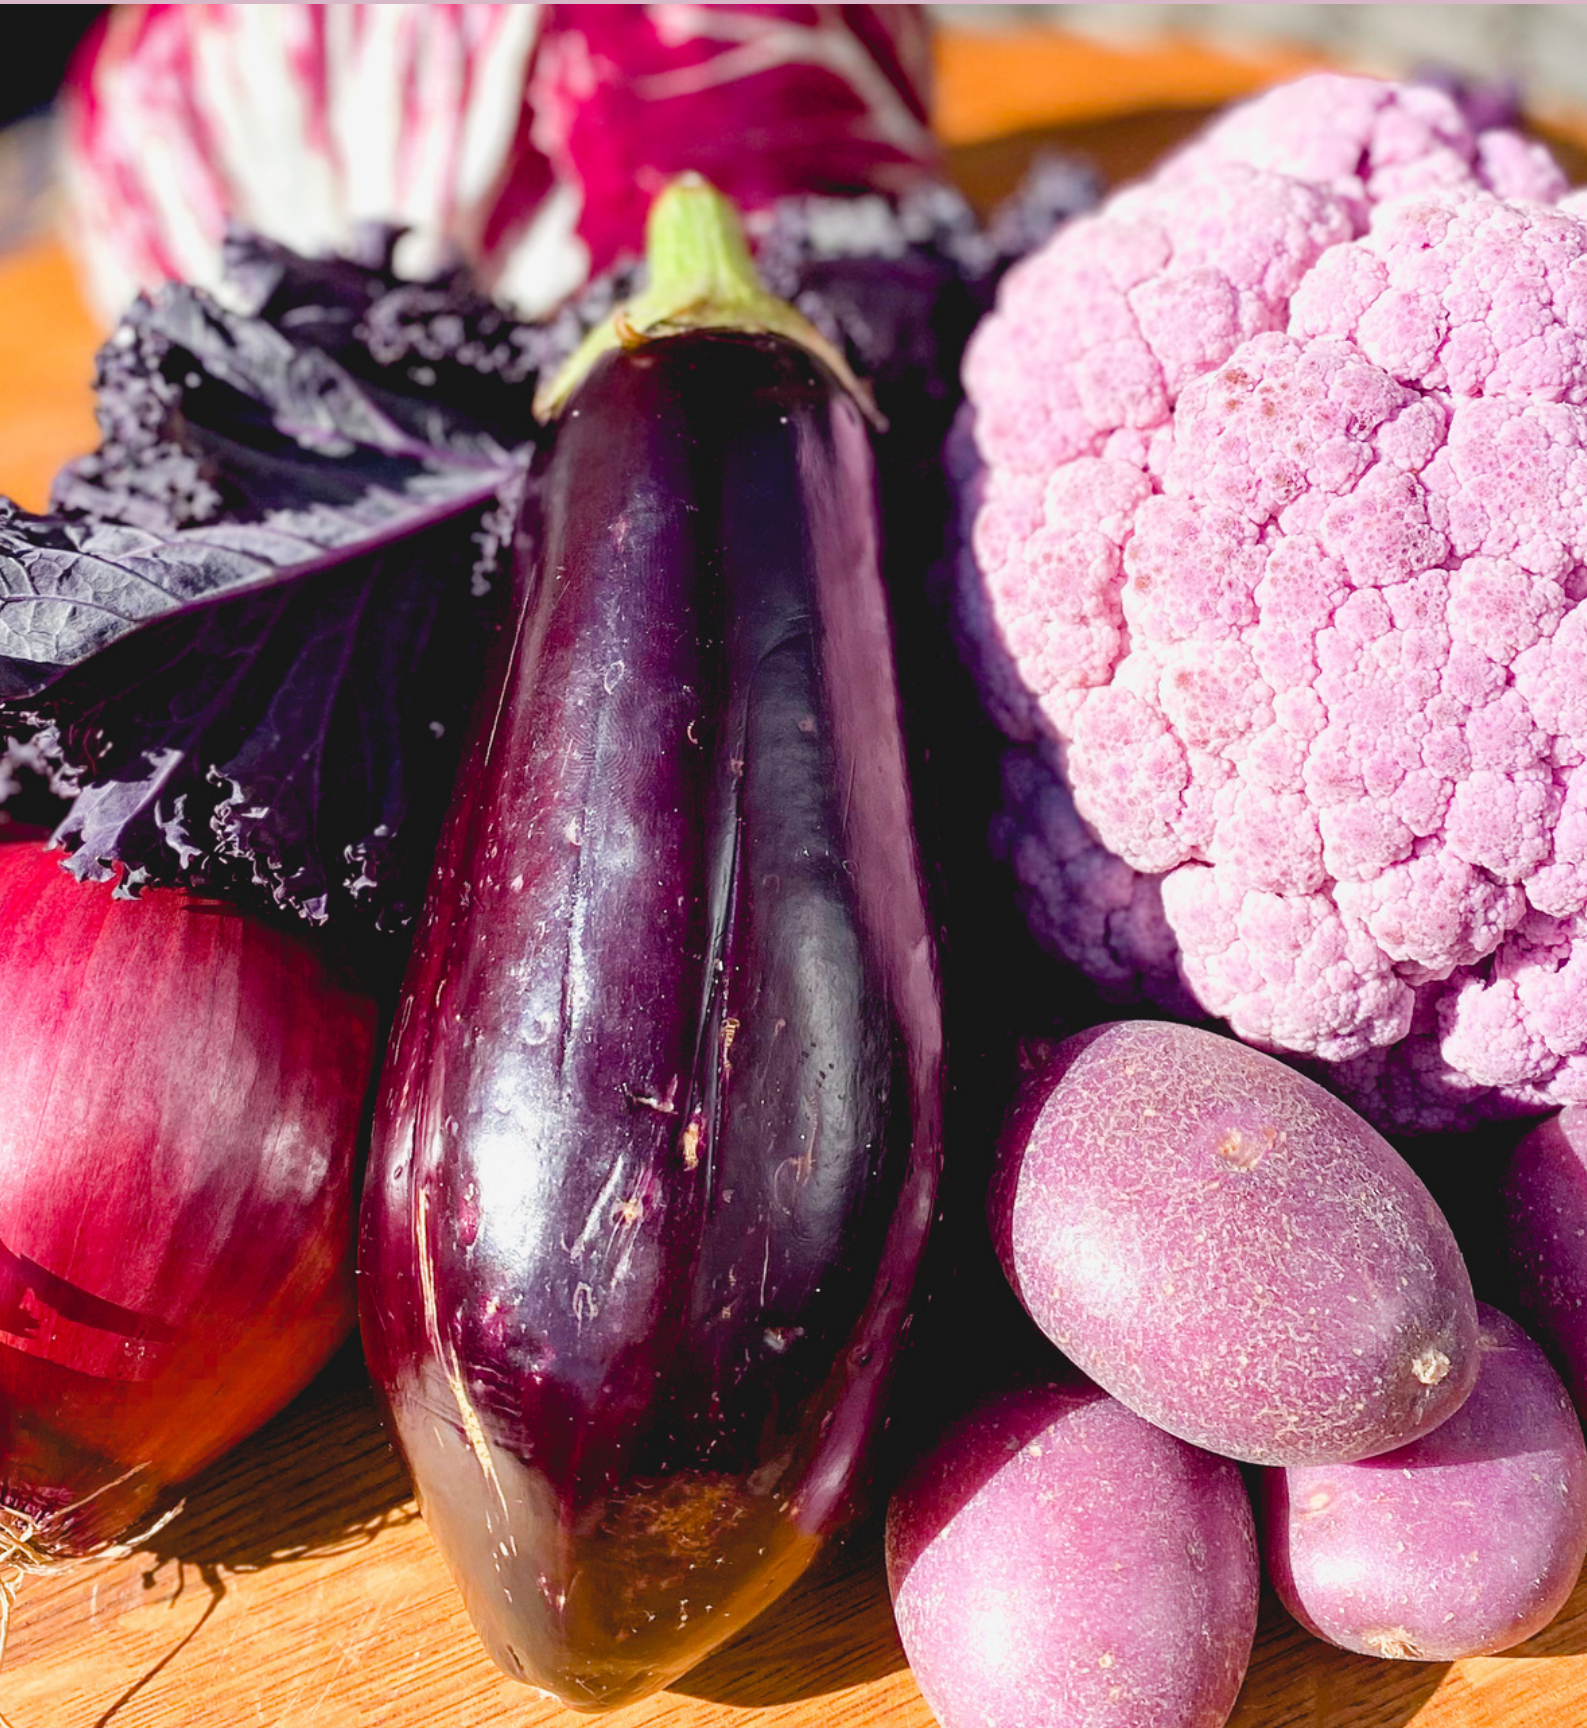



# SIMPLE FOOD SWAPS TO INCREASE THE ANTHOCYANINS IN YOUR FAVOURITE MEALS

|                                                                                     |                 |                                                                                     |                                                                                      |                     |
|-------------------------------------------------------------------------------------|-----------------|-------------------------------------------------------------------------------------|--------------------------------------------------------------------------------------|---------------------|
|    | Brown onions    |    |    | Red onions          |
|    | Green grapes    |    |    | Red & Purple grapes |
|    | Green Cabbage   |    |    | Purple Cabbage      |
|    | White wine      |    |    | Red wine            |
|    | White rice      |    |    | Black rice          |
|  | Iceberg Lettuce |  |  | Red leaf lettuce    |
|  | Cauliflower     |  |  | Purple Cauliflower  |
|  | Green apples    |  |  | Red apples          |
|  | Marmalade       |  |  | Berry jams          |
|  | Orange Juice    |  |  | Blood orange juice  |
|  | Chickpeas       |  |  | Blackbeans          |
|  | White vinegar   |  |  | Red wine vinegar    |

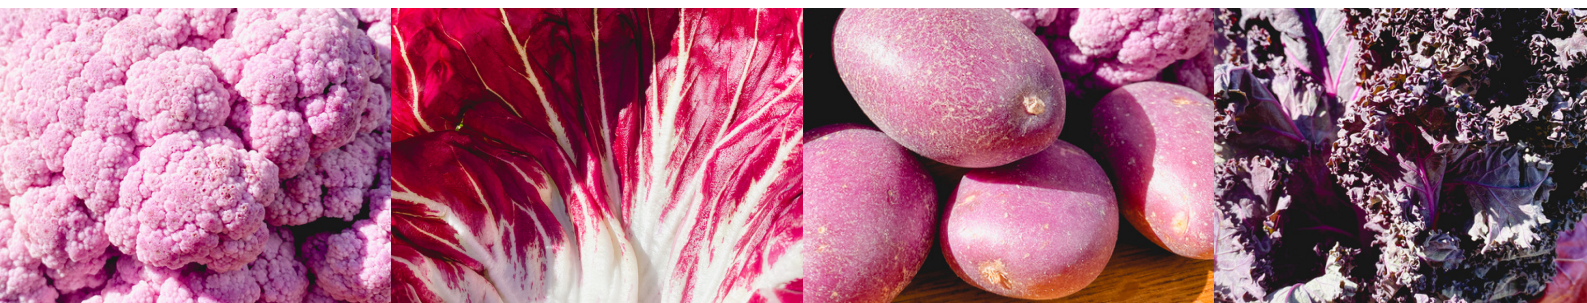

# WHAT'S IN SEASON FOR ANTHOCYANINS? SUMMER

## FRUIT

- Blackberry
- Blueberry
- Boysenberry
- Cherry
- Currant
- Guava
- Mulberry
- Raspberry
- Rhubarb
- Strawberry

## VEGETABLES

- Purple asparagus
- Eggplant
- Radish

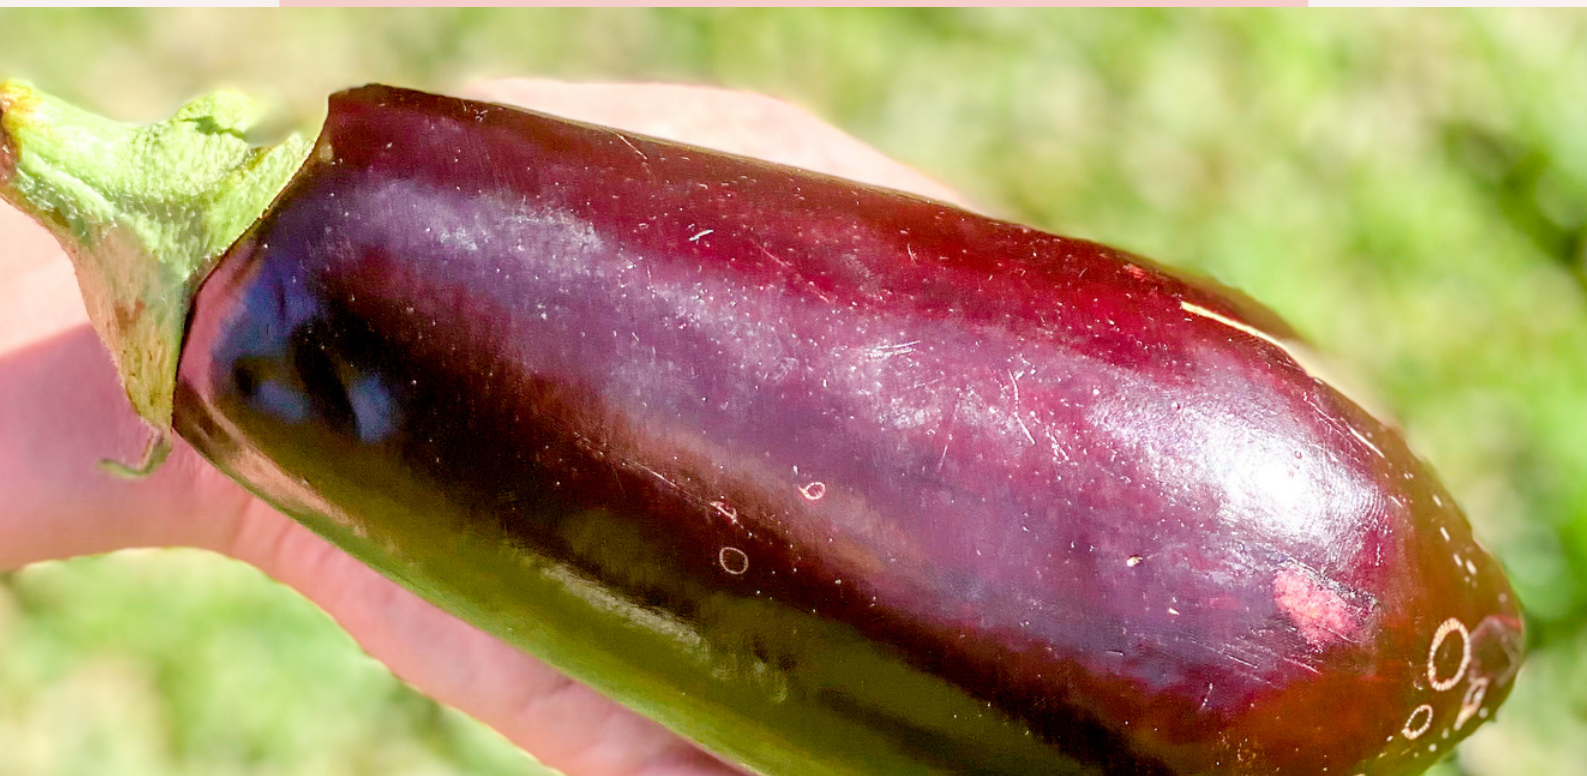

Supplement: s1 [file s1]
